# Supplementary material for: A real-world study was conducted to develop a nomogram that predicts the occurrence of anastomotic leakage in patients with esophageal cancer following esophagectomy
Source: publisher site journal article supplement (doi:10.18632/aging.205780), 2024-05-01
Supplement: Supplementary file [file aging-v16i9-205780-supplementary-material-SD1.pdf]

## SUPPLEMENTARY FIGURE

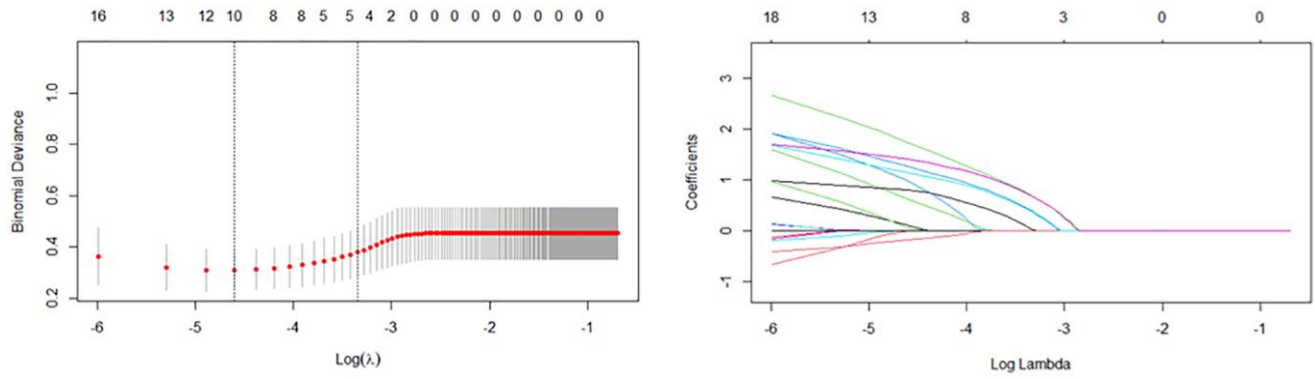

Supplementary Figure 1. LASSO logistic regression analysis to identify candidate predictors for anastomotic leakage.
