# Supplementary material for: A real-world study was conducted to develop a nomogram that predicts the occurrence of anastomotic leakage in patients with esophageal cancer following esophagectomy
Source: publisher site journal article supplement (doi:10.18632/aging.205780), 2024-05-01
Supplement: Supplementary file [file aging-v16i9-205780-supplementary-material-SD2.pdf]

## SUPPLEMENTARY TABLES

**Supplementary Table 1. The severity grading of AL after esophagectomy.**

| <b>Grade</b> | <b>Definition</b>                                        | <b>Number</b> |
|--------------|----------------------------------------------------------|---------------|
| A            | AL needs no active therapeutic interventions             | 3             |
| B            | AL needs active therapeutic interventions but no surgery | 21            |
| C            | AL needs surgery                                         | 1             |

Abbreviation: AL: anastomotic leakage.

**Supplementary Table 2. The levels of four markers among three groups of AL according to the severity of AL.**

| <b>Markers</b> | <b>Grade A</b>  | <b>Grade B</b> | <b>Grade C*</b> |
|----------------|-----------------|----------------|-----------------|
| CRP (mg/l)     | 228.75 ± 116.16 | 178.23 ± 51.48 | 223.68          |
| PCT (ng/ml)    | 2.07 ± 0.95     | 5.19 ± 3.04    | 5.77            |
| IL-6 (pg/ml)   | 125.67 ± 52.41  | 209.73 ± 53.51 | 293.76          |
| IL-10 (pg/ml)  | 22.23 ± 14.86   | 13.99 ± 6.43   | 16.25           |

Abbreviations: AL: anastomotic leakage; IL-6: interleukin-6; IL-10: interleukin-10; CRP: C-reactive protein; PCT: Procalcitonin.

\*We did not conduct statistical analysis, because only one patient was Grade C.
